# Supplementary material
Source: MDPI journal article supplement (https://www.mdpi.com/2504-5377/6/4/76)

Table S1: Z-potential and Z-size values for all the samples with statistical interpretation

| Sample | Zeta   | Z-Ave d.nm |
|--------|--------|------------|
| 0,00   | -33,00 | 170,60     |
| 0,00   | -32,30 | 175,90     |
| 0,00   | -34,10 | 174,90     |
| 0,00   | -33,10 | 175,20     |
| 0,00   | -34,10 | 163,60     |
| 0,00   | -31,90 | 166,70     |
| 0,00   | -34,50 | 189,50     |
| 0,00   | -33,80 | 187,70     |
| 0,00   | -35,50 | 187,10     |
| 0,10   | -33,90 | 165,60     |
| 0,10   | -33,00 | 159,50     |
| 0,10   | -35,50 | 158,80     |
| 0,10   | -36,30 | 142,90     |
| 0,10   | -36,80 | 158,10     |
| 0,10   | -37,80 | 162,30     |
| 0,10   | -35,00 | 145,90     |
| 0,10   | -35,40 | 142,40     |
| 0,10   | -35,00 | 136,50     |
| 0,20   | -35,10 | 134,00     |
| 0,20   | -34,20 | 130,70     |
| 0,20   | -36,10 | 132,00     |
| 0,20   | -34,30 | 167,00     |
| 0,20   | -37,40 | 156,60     |
| 0,20   | -36,00 | 145,60     |
| 0,20   | -35,60 | 151,40     |
| 0,20   | -37,60 | 155,20     |
| 0,20   | -36,90 | 160,20     |
| 0,40   | -30,00 | 300,80     |
| 0,40   | -28,40 | 304,00     |
| 0,40   | -29,70 | 286,40     |
| 0,40   | -30,00 | 211,60     |
| 0,40   | -30,90 | 215,70     |
| 0,40   | -30,60 | 215,60     |
| 0,40   | -30,10 | 171,50     |
| 0,40   | -32,50 | 166,70     |
| 0,40   | -32,00 | 157,70     |

| ANOVAOneWay (5/23/2021 11:05:33) |            |           |        |               |            |  |
|----------------------------------|------------|-----------|--------|---------------|------------|--|
| Descriptive Statistics           |            |           |        |               |            |  |
|                                  | N Analysis | N Missing | Mean   | Standard Devi | SE of Mean |  |
| 0,00                             | 6,00       | 3,00      | -33,77 | 0,60          | 0,24       |  |
| 0,10                             | 6,00       | 3,00      | -35,67 | 0,73          | 0,30       |  |
| 0,20                             | 6,00       | 3,00      | -35,22 | 0,83          | 0,34       |  |
| 0,40                             | 6,00       | 3,00      | -30,22 | 0,44          | 0,18       |  |

| ANOVAOneWay (5/23/2021 10:22:36) |            |           |        |               |            |  |
|----------------------------------|------------|-----------|--------|---------------|------------|--|
| Descriptive Statistics           |            |           |        |               |            |  |
|                                  | N Analysis | N Missing | Mean   | Standard Devi | SE of Mean |  |
| 0,00                             | 9,00       | 0,00      | -33,59 | 1,13          | 0,38       |  |
| 0,10                             | 9,00       | 0,00      | -35,41 | 1,45          | 0,48       |  |
| 0,20                             | 9,00       | 0,00      | -35,91 | 1,24          | 0,41       |  |
| 0,40                             | 9,00       | 0,00      | -30,47 | 1,23          | 0,41       |  |

ANOVAOneWay (5/23/2021 10:22:36)

ANOVA

Means Comparisons

Grouping Letters Table

| Tukey Test Mean | Groups | Groups | Groups |
|-----------------|--------|--------|--------|
| 0,40            | -30,47 | A      |        |
| 0,00            | -33,59 |        | B      |
| 0,10            | -35,41 |        | C      |
| 0,20            | -35,91 |        | C      |

| ANOVAOneWay (5/23/2021 11:15:28) |            |         |        |            |            |  |
|----------------------------------|------------|---------|--------|------------|------------|--|
| Descriptive Statistics           |            |         |        |            |            |  |
|                                  | N Analysis | N Missi | Mean   | Standard t | SE of Mean |  |
| 0,00                             | 9,00       | 0,00    | 176,80 | 9,41       | 3,14       |  |
| 0,10                             | 9,00       | 0,00    | 152,44 | 10,50      | 3,50       |  |
| 0,20                             | 9,00       | 0,00    | 148,08 | 13,25      | 4,42       |  |
| 0,40                             | 7,00       | 2,00    | 203,60 | 44,18      | 16,70      |  |

ANOVA

Means Comparisons

Grouping Letters Table

| Tukey Test | Mean   | Groups | Groups | Groups |
|------------|--------|--------|--------|--------|
| 0,40       | 203,60 | A      |        |        |
| 0,00       | 176,80 | A      | B      |        |
| 0,10       | 152,44 |        | B      | C      |
| 0,20       | 148,08 |        |        | C      |

| Salt Concentration | ζ-potential |      | Size  |       |
|--------------------|-------------|------|-------|-------|
| M                  | mV          |      | d.nm  |       |
| 0                  | -33,8       | ±0.6 | 176,8 | ±9.4  |
| 0,1                | -35,7       | ±0.7 | 152,4 | ±10.5 |
| 0,2                | -35,2       | ±0.8 | 148,1 | ±13.2 |
| 0,4                | -30,2       | ±0.4 | 203,6 | ±44.2 |

Table S2: DLS analysis and test parameters and conditions

| SPPH           |      |            |                              |    |       |         |           |           |           |           |           |           |            |                  |
|----------------|------|------------|------------------------------|----|-------|---------|-----------|-----------|-----------|-----------|-----------|-----------|------------|------------------|
| Record         | Type | Sample Na  | Measurement Date and Tir T   | °C | ZP    | Mob     | Cond      |           |           |           |           |           |            |                  |
|                |      |            |                              |    | mV    | μmcm/Vs | mS/cm     |           |           |           |           |           |            |                  |
| 91             | Zeta | SPPH 0.01% | Monday, May 3, 2021 3:34     |    | 23    | -33     | -2,486    | 0,299     |           |           |           |           |            |                  |
| 92             | Zeta | SPPH 0.01% | Monday, May 3, 2021 3:36     |    | 23    | -32,3   | -2,436    | 0,304     |           |           |           |           |            |                  |
| 93             | Zeta | SPPH 0.01% | Monday, May 3, 2021 3:37     |    | 23    | -34,1   | -2,571    | 0,307     |           |           |           |           |            |                  |
| 4              | Zeta | SPPH 0.01% | Wednesday, May 12, 2021      |    | 23    | -33,1   | -2,494    | 0,293     |           |           |           |           |            |                  |
| 5              | Zeta | SPPH 0.01% | Wednesday, May 12, 2021      |    | 23    | -34,1   | -2,569    | 0,297     |           |           |           |           |            |                  |
| 6              | Zeta | SPPH 0.01% | Wednesday, May 12, 2021      |    | 23    | -31,9   | -2,407    | 0,295     |           |           |           |           |            |                  |
| 203            | Zeta | PPHS 0.01% | Friday, April 23, 2021 4:15: |    | 23    | -34,5   | -2,6      | 0,639     |           |           |           |           |            |                  |
| 204            | Zeta | PPHS 0.01% | Friday, April 23, 2021 4:17: |    | 23    | -33,8   | -2,55     | 0,653     |           |           |           |           |            |                  |
| 205            | Zeta | PPHS 0.01% | Friday, April 23, 2021 4:17: |    | 23    | -35,5   | -2,674    | 0,663     |           |           |           |           |            |                  |
| Record         | Type | Sample Na  | Measurement Date and Tir T   | °C | Z-Ave | PdI     | Pk 1 Mean | Pk 2 Mean | Pk 3 Mean | Pk 1 Area | Pk 2 Area | Pk 3 Area | Aggregatio | Scattering Angle |
|                |      |            |                              |    | d.nm  |         | d.nm      | d.nm      | d.nm      | Percent   | Percent   | Percent   | *          | °                |
| 206            | Size | PPHS 0.01% | Friday, April 23, 2021 4:23: |    | 25    | 170,6   | 0,167     | 206,4     | 0         | 0         | 100       | 0         | 0          | 173              |
| 207            | Size | PPHS 0.01% | Friday, April 23, 2021 4:25: |    | 25    | 175,9   | 0,167     | 212,7     | 0         | 0         | 100       | 0         | 0          | 173              |
| 208            | Size | PPHS 0.01% | Friday, April 23, 2021 4:27: |    | 25    | 174,9   | 0,216     | 227,9     | 0         | 0         | 100       | 0         | 0          | 173              |
| 76             | Size | SPPH 0.01% | Monday, May 3, 2021 2:49     |    | 25    | 175,2   | 0,35      | 238       | 44,6      | 4800      | 91,3      | 5,9       | 2,8        | 173              |
| 77             | Size | SPPH 0.01% | Monday, May 3, 2021 2:51     |    | 25    | 163,6   | 0,343     | 221,3     | 4644      | 0         | 97,3      | 2,7       | 0          | 173              |
| 78             | Size | SPPH 0.01% | Monday, May 3, 2021 2:53     |    | 25    | 166,7   | 0,292     | 251,3     | 33,2      | 4418      | 95,6      | 3,3       | 1,1        | 173              |
| 72             | Size | SPPH 0.01% | Wednesday, May 12, 2021      |    | 25    | 189,5   | 0,306     | 289,7     | 0         | 0         | 100       | 0         | 0          | 173              |
| 73             | Size | SPPH 0.01% | Wednesday, May 12, 2021      |    | 25    | 187,7   | 0,355     | 272,4     | 35,27     | 4840      | 94,8      | 3,9       | 1,3        | 173              |
| 74             | Size | SPPH 0.01% | Wednesday, May 12, 2021      |    | 25    | 187,1   | 0,355     | 271,9     | 39,86     | 4638      | 93,1      | 5,1       | 1,8        | 173              |
| SPPH 0.1M NaCl |      |            |                              |    |       |         |           |           |           |           |           |           |            |                  |
| Record         | Type | Sample Na  | Measurement Date and Tir T   | °C | Z-Ave | PdI     | Pk 1 Mean | Pk 2 Mean | Pk 3 Mean | Pk 1 Area | Pk 2 Area | Pk 3 Area | Aggregatio | Scattering Angle |
|                |      |            |                              |    | d.nm  |         | d.nm      | d.nm      | d.nm      | Percent   | Percent   | Percent   | *          | °                |
| 70             | Size | PPHS 0.01% | Friday, April 23, 2021 4:31: |    | 25    | 165,6   | 0,283     | 197,3     | 3830      | 0         | 93,2      | 6,8       | 0          | 173              |
| 71             | Size | PPHS 0.01% | Friday, April 23, 2021 4:33: |    | 25    | 159,5   | 0,285     | 219,1     | 4141      | 0         | 97,1      | 2,9       | 0          | 173              |
| 72             | Size | PPHS 0.01% | Friday, April 23, 2021 4:36: |    | 25    | 158,8   | 0,283     | 225,8     | 4153      | 30,09     | 96        | 2,4       | 1,6        | 173              |
| 55             | Size | SPPH 0.01% | Wednesday, May 12, 2021      |    | 25    | 142,9   | 0,295     | 252,5     | 0         | 0         | 100       | 0         | 0          | 173              |
| 56             | Size | SPPH 0.01% | Wednesday, May 12, 2021      |    | 25    | 158,1   | 0,312     | 235,2     | 4831      | 22,34     | 97,8      | 1,1       | 1,1        | 173              |
| 57             | Size | SPPH 0.01% | Wednesday, May 12, 2021      |    | 25    | 162,3   | 0,363     | 230,7     | 4633      | 0         | 97,5      | 2,5       | 0          | 173              |
| 64             | Size | SPPH 0.01% | Monday, May 3, 2021 2:12     |    | 25    | 145,9   | 0,26      | 197,4     | 4673      | 0         | 98,3      | 1,7       | 0          | 173              |
| 65             | Size | SPPH 0.01% | Monday, May 3, 2021 2:15     |    | 25    | 142,4   | 0,256     | 192,9     | 33,68     | 0         | 96,5      | 3,5       | 0          | 173              |
| 66             | Size | SPPH 0.01% | Monday, May 3, 2021 2:17     |    | 25    | 136,5   | 0,249     | 186,7     | 0         | 0         | 100       | 0         | 0          | 173              |
| Record         | Type | Sample Na  | Measurement Date and Tir T   |    | ZP    | Mob     | Cond      |           |           |           |           |           |            |                  |
|                |      |            |                              |    |       |         |           |           |           |           |           |           |            |                  |
| 15             | Zeta | SPPH 0.01% | Monday, May 3, 2021 12:4:    |    | 23    | -33,9   | -2,556    | 0,355     |           |           |           |           |            |                  |
| 17             | Zeta | SPPH 0.01% | Monday, May 3, 2021 12:4:    |    | 23    | -33     | -2,486    | 0,354     |           |           |           |           |            |                  |
| 18             | Zeta | SPPH 0.01% | Monday, May 3, 2021 12:4:    |    | 23    | -35,5   | -2,678    | 0,357     |           |           |           |           |            |                  |
| 32             | Zeta | SPPH 0.01% | Wednesday, May 12, 2021      |    | 23    | -36,3   | -2,737    | 0,294     |           |           |           |           |            |                  |
| 33             | Zeta | SPPH 0.01% | Wednesday, May 12, 2021      |    | 23    | -36,8   | -2,776    | 0,299     |           |           |           |           |            |                  |
| 34             | Zeta | SPPH 0.01% | Wednesday, May 12, 2021      |    | 23    | -37,8   | -2,847    | 0,302     |           |           |           |           |            |                  |
| 35             | Zeta | PPHS 0.01% | Friday, April 23, 2021 2:29: |    | 23    | -35     | -2,635    | 0,455     |           |           |           |           |            |                  |
| 36             | Zeta | PPHS 0.01% | Friday, April 23, 2021 2:30: |    | 23    | -35,4   | -2,671    | 0,461     |           |           |           |           |            |                  |
| 38             | Zeta | PPHS 0.01% | Friday, April 23, 2021 2:47: |    | 23    | -35     | -2,638    | 0,448     |           |           |           |           |            |                  |

| SPPH 0.2M NaCl |      |            |                               |            |             |                |                |                |                   |                   |                   |            |                    |
|----------------|------|------------|-------------------------------|------------|-------------|----------------|----------------|----------------|-------------------|-------------------|-------------------|------------|--------------------|
| Record         | Type | Sample NaI | Measurement Date and Tin T °C | ZP mV      | Mob μmcm/Vs | Cond mS/cm     |                |                |                   |                   |                   |            |                    |
| 46             | Zeta | PPHS 0.01% | Friday, April 23, 2021 3:56:  | 23         | -35,1       | -2,647         | 0,556          |                |                   |                   |                   |            |                    |
| 47             | Zeta | PPHS 0.01% | Friday, April 23, 2021 3:58:  | 23         | -34,2       | -2,575         | 0,57           |                |                   |                   |                   |            |                    |
| 48             | Zeta | PPHS 0.01% | Friday, April 23, 2021 3:59:  | 23         | -36,1       | -2,722         | 0,578          |                |                   |                   |                   |            |                    |
| 22             | Zeta | SPPH 0.01% | Monday, May 3, 2021 12:5:     | 23         | -34,3       | -2,584         | 0,48           |                |                   |                   |                   |            |                    |
| 23             | Zeta | SPPH 0.01% | Monday, May 3, 2021 12:5:     | 23         | -37,4       | -2,821         | 0,49           |                |                   |                   |                   |            |                    |
| 24             | Zeta | SPPH 0.01% | Monday, May 3, 2021 12:5:     | 23         | -36         | -2,717         | 0,496          |                |                   |                   |                   |            |                    |
| 41             | Zeta | SPPH 0.01% | Wednesday, May 12, 2021       | 23         | -35,6       | -2,68          | 0,606          |                |                   |                   |                   |            |                    |
| 42             | Zeta | SPPH 0.01% | Wednesday, May 12, 2021       | 23         | -37,6       | -2,837         | 0,624          |                |                   |                   |                   |            |                    |
| 45             | Zeta | SPPH 0.01% | Wednesday, May 12, 2021       | 23         | -36,9       | -2,783         | 0,634          |                |                   |                   |                   |            |                    |
| Record         | Type | Sample NaI | Measurement Date and Tin T °C | Z-Ave d.nm | Pdl         | Pk 1 Mean d.nm | Pk 2 Mean d.nm | Pk 3 Mean d.nm | Pk 1 Area Percent | Pk 2 Area Percent | Pk 3 Area Percent | Aggregatio | Scattering Angle ° |
| 73             | Size | PPHS 0.01% | Friday, April 23, 2021 4:41:  | 25         | 134         | 0,226          | 162,7          | 0              | 100               | 0                 | 0                 |            | 173                |
| 74             | Size | PPHS 0.01% | Friday, April 23, 2021 4:43:  | 25         | 130,7       | 0,225          | 161,9          | 4851           | 0                 | 98,8              | 1,2               | 0          | 173                |
| 75             | Size | PPHS 0.01% | Friday, April 23, 2021 4:45:  | 25         | 132         | 0,22           | 164,8          | 0              | 100               | 0                 | 0                 |            | 173                |
| 87             | Size | SPPH 0.01% | Monday, May 3, 2021 3:20:     | 25         | 167         | 0,298          | 220            | 4983           | 0                 | 97,6              | 2,4               | 0          | 173                |
| 89             | Size | SPPH 0.01% | Monday, May 3, 2021 3:28:     | 25         | 156,6       | 0,294          | 220,8          | 4850           | 19,64             | 98,6              | 1,3               | 0,1        | 173                |
| 90             | Size | SPPH 0.01% | Monday, May 3, 2021 3:30:     | 25         | 145,6       | 0,26           | 182,7          | 4691           | 0                 | 97,7              | 2,3               | 0          | 173                |
| 65             | Size | SPPH 0.01% | Wednesday, May 12, 2021       | 25         | 151,4       | 0,39           | 278,7          | 0              | 100               | 0                 | 0                 |            | 173                |
| 66             | Size | SPPH 0.01% | Wednesday, May 12, 2021       | 25         | 155,2       | 0,378          | 216,7          | 2537           | 33,71             | 87,7              | 8,1               | 4,2        | 173                |
| 67             | Size | SPPH 0.01% | Wednesday, May 12, 2021       | 25         | 160,2       | 0,385          | 246,5          | 4470           | 0                 | 98,5              | 1,5               | 0          | 173                |
| SPPH 0.4M NaCl |      |            |                               |            |             |                |                |                |                   |                   |                   |            |                    |
| Record         | Type | Sample NaI | Measurement Date and Tin T °C | ZP mV      | Mob μmcm/Vs | Cond mS/cm     |                |                |                   |                   |                   |            |                    |
| 51             | Zeta | PPHS 0.01% | Friday, April 23, 2021 4:04:  | 23         | -30         | -2,262         | 0,0968         |                |                   |                   |                   |            |                    |
| 53             | Zeta | PPHS 0.01% | Friday, April 23, 2021 4:07:  | 23         | -28,4       | -2,145         | 0,0965         |                |                   |                   |                   |            |                    |
| 54             | Zeta | PPHS 0.01% | Friday, April 23, 2021 4:08:  | 23         | -29,7       | -2,238         | 0,0968         |                |                   |                   |                   |            |                    |
| 25             | Zeta | SPPH 0.01% | Monday, May 3, 2021 12:5:     | 23         | -30         | -2,259         | 0,775          |                |                   |                   |                   |            |                    |
| 26             | Zeta | SPPH 0.01% | Monday, May 3, 2021 12:5:     | 23         | -30,9       | -2,327         | 0,81           |                |                   |                   |                   |            |                    |
| 31             | Zeta | SPPH 0.01% | Monday, May 3, 2021 1:06:     | 23         | -30,6       | -2,31          | 0,789          |                |                   |                   |                   |            |                    |
| 25             | Zeta | SPPH 0.01% | Wednesday, May 12, 2021       | 23         | -30,1       | -2,272         | 0,607          |                |                   |                   |                   |            |                    |
| 26             | Zeta | SPPH 0.01% | Wednesday, May 12, 2021       | 23         | -32,5       | -2,452         | 6,30E-01       |                |                   |                   |                   |            |                    |
| 27             | Zeta | SPPH 0.01% | Wednesday, May 12, 2021       | 23         | -32         | -2,413         | 0,639          |                |                   |                   |                   |            |                    |
| Record         | Type | Sample NaI | Measurement Date and Tin T °C | Z-Ave d.nm | Pdl         | Pk 1 Mean d.nm | Pk 2 Mean d.nm | Pk 3 Mean d.nm | Pk 1 Area Percent | Pk 2 Area Percent | Pk 3 Area Percent | Aggregatio | Scattering Angle ° |
| 76             | Size | PPHS 0.01% | Friday, April 23, 2021 4:49:  | 25         | 300,8       | 0,361          | 514,8          | 0              | 100               | 0                 | 0                 |            | 173                |
| 77             | Size | PPHS 0.01% | Friday, April 23, 2021 4:51:  | 25         | 304         | 0,475          | 540,6          | 4421           | 0                 | 98,1              | 1,9               | 0          | 173                |
| 78             | Size | PPHS 0.01% | Friday, April 23, 2021 4:53:  | 25         | 286,4       | 0,391          | 497,1          | 0              | 100               | 0                 | 0                 |            | 173                |
| 68             | Size | SPPH 0.01% | Wednesday, May 12, 2021       | 25         | 211,6       | 0,367          | 335,9          | 0              | 100               | 0                 | 0                 |            | 173                |
| 69             | Size | SPPH 0.01% | Wednesday, May 12, 2021       | 25         | 215,7       | 0,367          | 325,9          | 39,23          | 4315              | 94,5              | 3                 | 2,5        | 173                |
| 70             | Size | SPPH 0.01% | Wednesday, May 12, 2021       | 25         | 215,6       | 0,298          | 336,9          | 30,77          | 0                 | 97,4              | 2,6               | 0          | 173                |
| 82             | Size | SPPH 0.01% | Monday, May 3, 2021 3:07:     | 25         | 171,5       | 0,338          | 291,2          | 4105           | 0                 | 99,1              | 0,9               | 0          | 173                |
| 83             | Size | SPPH 0.01% | Monday, May 3, 2021 3:09:     | 25         | 166,7       | 0,263          | 237,4          | 4004           | 0                 | 98,4              | 1,6               | 0          | 173                |
| 84             | Size | SPPH 0.01% | Monday, May 3, 2021 3:12:     | 25         | 157,7       | 0,259          | 212,5          | 0              | 100               | 0                 | 0                 |            | 173                |

Table S3: Frequency dependence of dilatational viscoelastic properties of the samples

| Salt Concentræ M | Frequency Hz | E' (average) mN/m | std     | E'' (average) mN/m | std     | tand    |
|------------------|--------------|-------------------|---------|--------------------|---------|---------|
|                  | 0            | 0.1               | 9,6198  | 246.036            | 5,0826  | 0.88275 |
|                  | 0            | 0.2               | 10,7259 | 188.082            | 5,2988  | 1.294   |
|                  | 0            | 0.4               | 14,5634 | 179.493            | 8,5140  | 142.339 |
|                  | 0            | 1                 | 19,8010 | 2.198              | 10,5730 | 268.971 |
|                  | 0.1          | 0.1               | 7,9068  | 0.28535            | 3,5076  | 0.27656 |
|                  | 0.1          | 0.2               | 8,5116  | 157.073            | 4,7065  | 0.54741 |
|                  | 0.1          | 0.4               | 11,0582 | 0.85369            | 6,6130  | 0.53446 |
|                  | 0.1          | 1                 | 16,9223 | 126.573            | 8,6703  | 297.983 |
|                  | 0.2          | 0.1               | 7,9634  | 0.71505            | 3,1260  | 0.66574 |
|                  | 0.2          | 0.2               | 8,7298  | 157.165            | 4,3210  | 0.54683 |
|                  | 0.2          | 0.4               | 11,0582 | 0.85369            | 7,4056  | 147.573 |
|                  | 0.2          | 1                 | 14,7390 | 128.494            | 9,9503  | 247.262 |
|                  | 0.4          | 0.1               | 7,4638  | 0.5794             | 3,3268  | 0.69668 |
|                  | 0.4          | 0.2               | 8,5980  | 0.49679            | 4,4820  | 12.911  |
|                  | 0.4          | 0.4               | 12,4348 | 159.882            | 5,7188  | 111.906 |
|                  | 0.4          | 1                 | 15,4740 | 0.28526            | 7,2476  | 116.041 |

Table S4: tangent loss factor values for dilatational viscoelastic properties

| frequency 0.1 |      | frequency 0.2 |      | frequency 0.4 |      | frequency 1 |      |
|---------------|------|---------------|------|---------------|------|-------------|------|
| tand          | salt | tand          | salt | tand          | salt | tand        | salt |
| 0,53          | 0    | 0,49          | 0    | 0,58          | 0    | 0,53        | 0    |
| 0,44          | 0,1  | 0,55          | 0,1  | 0,6           | 0,1  | 0,51        | 0,1  |
| 0,39          | 0,2  | 0,49          | 0,2  | 0,67          | 0,2  | 0,68        | 0,2  |
| 0,45          | 0,4  | 0,52          | 0,4  | 0,46          | 0,4  | 0,47        | 0,4  |

Figure S1: Tangent loss factor evolution in function of salt concentration for all the considered frequencies

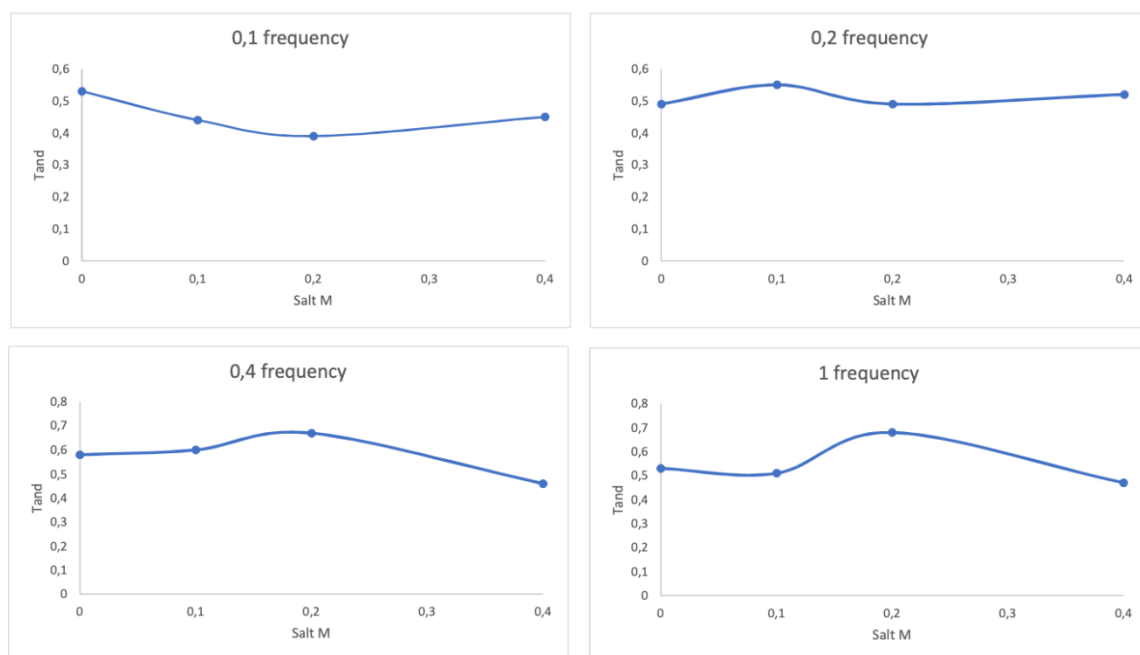

Figure S2: Particle size distribution for SPPH sample with 0 M of NaCl concentration.

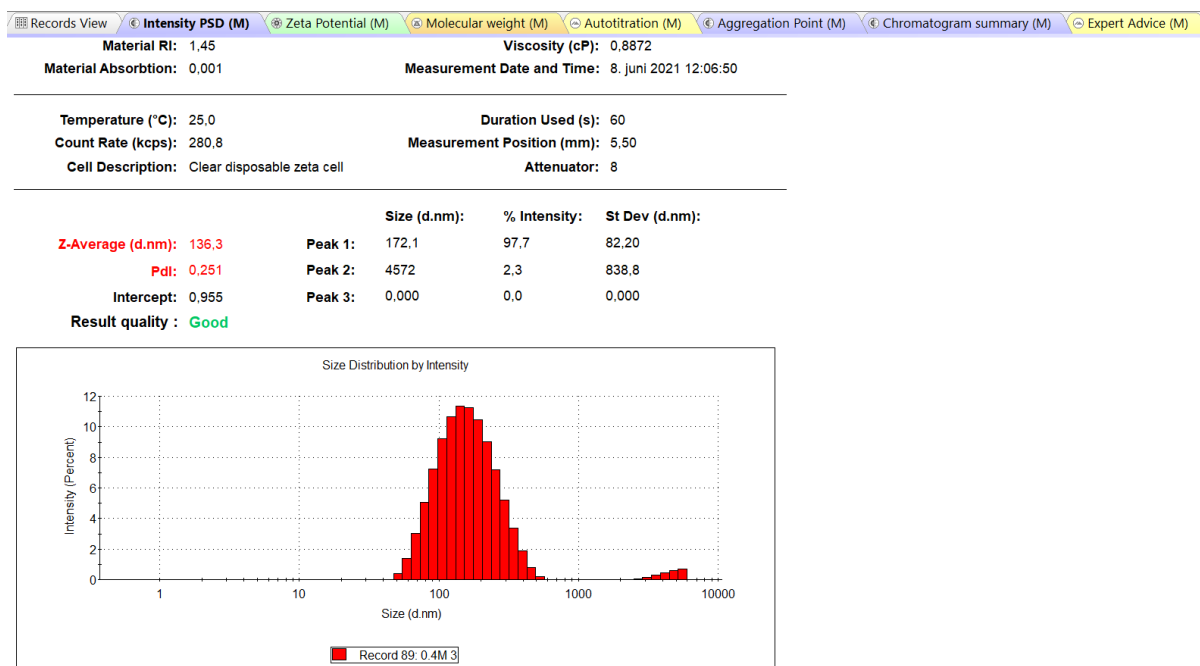

Figure S3: Interfacial Tension Values over time of all of the samples.

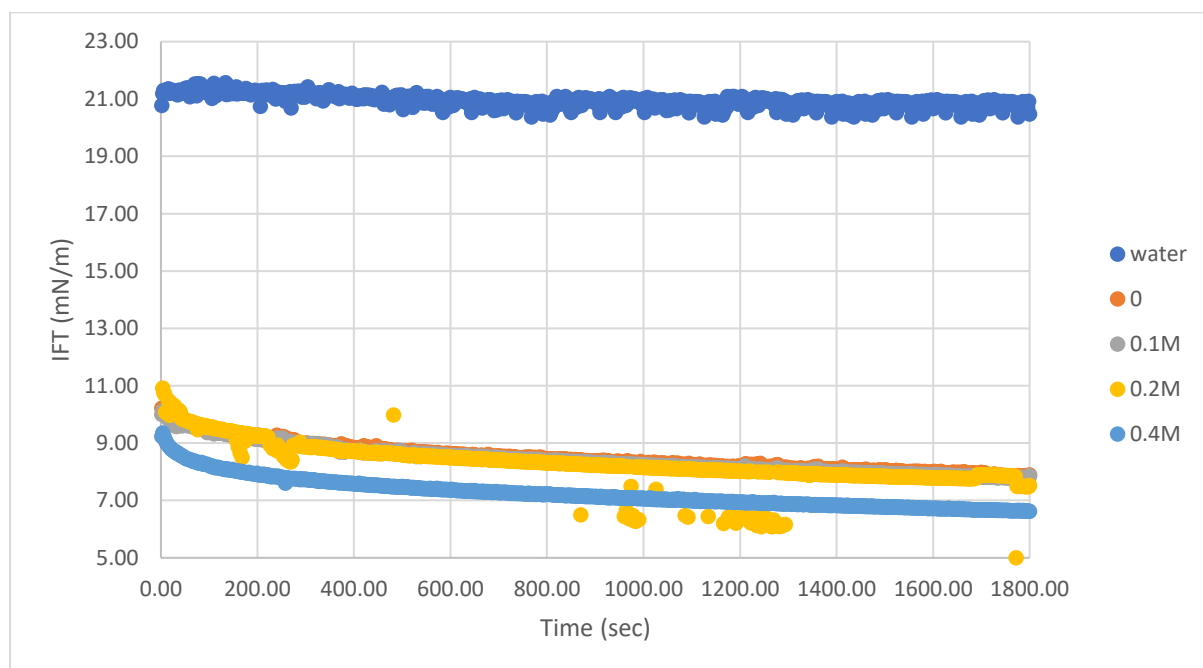

Supplement: s1 [file s1]
